1  
2  
3  
4  
5  
6  
7  
8  
9  
10  
11  
12  
13  
14  
15  
16  
17  
18  
19  
20  
21  
22  
23  
24  
25  
26  
27  
28  
29  
30  
31  
32

VSEPRnet: Physical structure encoding of sequence-based biomolecules for  
functionality prediction: Case study with peptides

Siddharth Rath<sup>1,2,3</sup>, Jonathan Francis-Landau<sup>1,4,&</sup>, Ximing Lu<sup>1,5,&</sup>, Oliver Nakano-Baker<sup>1,2</sup>,  
Jacob Rodriguez<sup>1,2</sup>, Burak Berk Ustundag<sup>6</sup>, Mehmet Sarikaya<sup>1,2,7,8\*</sup>

<sup>1</sup>GEMSEC, Genetically Engineered Materials Science and Engineering Center,

<sup>2</sup> Department of Materials Science and Engineering, University of Washington, Seattle, WA, 98195, USA

<sup>3</sup> Department of Nanotechnology and Molecular Engineering, University of Washington, Seattle, WA, 98195, USA

<sup>4</sup> Department of Mathematics, University of Washington, Seattle, WA, 98195, USA

<sup>5</sup> Paul G. Allen School of Computer Science and Engineering, University of Washington, Seattle, WA, 98195, USA

<sup>6</sup> Faculty of Computer and Informatics Engineering, Istanbul Technical University, Maslak, Istanbul, 34469, Turkey

<sup>7</sup> Department of Chemical Engineering, University of Washington, Seattle, WA, 98195, USA

<sup>8</sup> Department of Oral Health Sciences, University of Washington, Seattle, WA, 98195, USA

\*Corresponding Author:

E-Mail: sarikaya@uw.edu

& These authors contributed equally to this work.

## 1 **Abstract**

2 Predicting structure-dependent functionalities of biomolecules is crucial for accelerating  
3 a wide variety of applications in drug-screening, biosensing, disease-diagnosis, and  
4 therapy. Although the commonly used structural “fingerprints” work for biomolecules in  
5 traditional informatics implementations, they remain impractical in a wide range of  
6 machine learning approaches where the model is restricted to make data-driven  
7 decisions. Although peptides, proteins, and oligonucleotides have sequence-related  
8 propensities, representing them as sequences of letters, e.g., in bioinformatics studies,  
9 causes a loss of most of their structure-related functionalities. Biomolecules lacking  
10 sequence, such as polysaccharides, lipids, and their peptide conjugates, cannot be  
11 screened with models using the letter-based fingerprints. Here we introduce a new  
12 fingerprint derived from valence shell electron pair repulsion structures for small peptides  
13 that enables construction of structural feature-maps for a given biomolecule, regardless  
14 of the sequence or conformation. The feature-map introduced here uses a simple  
15 encoding derived from the molecular graph - atoms, bonds, distances, bond angles, etc.,  
16 that make up each of the amino acids in the sequence, allowing a Residual Neural  
17 network model to take greater advantage of information in molecular structure. We make  
18 use of the short peptides binding to Major-Histocompatibility-Class-I protein alleles that  
19 are encoded in terms of their extended structures to predict allele-specific binding-  
20 affinities of test-peptides. Predictions are consistent, without appreciable loss in accuracy  
21 between models for different length sequences, marking an improvement over the current  
22 models. Biological processes are heterogeneous interactions, which justifies encoding all  
23 biomolecules universally in terms of structures and relating them to their functionality. The

24 capabilities facilitated by the model expands the paradigm in establishing structure-  
25 function correlations among small molecules, short and longer sequences including large  
26 biomolecules, and genetic conjugates that may include polypeptides, polynucleotides,  
27 RNAs, lipids, peptidoglycans, peptido-lipids, and other biomolecules that could be  
28 implemented in a wide range of medical and nanobiotechnological applications in the  
29 future.

## 30 **Introduction**

31 Cheminformatics tools have been used to predict solubility, binding-affinity to  
32 receptors, toxicity, and other properties of small-molecules, which, for example, include  
33 Extended-Connectivity-Fingerprints (ECFP's) [1], Reduced-Graph representations [2],  
34 Simplified-Molecular-Input-Line-Entry-System (SMILES) [3], SMILES-Arbitrary-Target-  
35 Specification (SMARTS),[4] and International-Chemical-Identifier (InCHI) string analysis  
36 tools [5], Autoencoder implementations [6], Coulomb-matrices [7], Symmetry functions [8]  
37 and Graph-Convolutions [9,10]. Success of such tools have stimulated their  
38 implementation in bioinformatics. Graph-Convolution-Networks (GCN), where each  
39 amino-acid (AA) unit is considered as a node, has been used successfully on  
40 polypeptides as a classification tool in prediction of the protein-ligand interface [11]. Tools  
41 such as PotentialNet [12] that learn AA-connectivity of ligand binding sites have also been  
42 successfully implemented. The focus of such tools, however, has been on the small ligand  
43 and not the large biomolecular receptors. Additionally, a comprehensive structural  
44 feature-map is unavailable for proteins and peptides as neither the molecular structures  
45 nor their conformations are taken into consideration in the current GCNs. GCNs consider  
46 atom or AA connectivity for predicting properties of small-molecules. However,

47 conformable biomolecules have connectivity beyond covalent bonds (such as hydrogen  
48 bonds) that are susceptible to changes based on the environmental and operational  
49 conditions. Tools directly employing three-dimensional coordinates as inputs to Neural  
50 Networks (NN) for small-molecule screening with integrated visualization-techniques  
51 have been developed [13]. However, the applications to biomacromolecules have been  
52 computationally intensive and currently impractical.

53 Traditional bioinformatics tools do not deal with small-molecules and are mostly  
54 concerned with AA sequences in proteins or oligonucleotide sequences in RNA and DNA.  
55 Letter-based representations are ubiquitous in addressing complicated functions owing  
56 to their simplicity, applicability, and accuracy in finding aligned domains in a sequence  
57 [14-17] or within a larger structure [18-20]. Several Machine Learning (ML) models to  
58 predict functionality using deep-learning, NNs, feature representation, and pattern  
59 analyses such as DeepMHC and NetMHCpan among others [21-23], have been  
60 developed by using the data in the Immuno-Epitope Database (IEDB) Analysis resource  
61 [24]. This database contains Major-Histocompatibility-Class-I, II (MHC-I, MHC-II) peptide-  
62 to-allele binding-affinity data for several species. In a recently developed Convolutional  
63 Neural Network (CNN), called DeepSeqPan [25], the authors recognize the importance  
64 of structural information in improving prediction accuracy and recommend their model as  
65 a supplement to other cumbersome models built with structural-alignment methods.

66 The traditional methodologies work only on letter-based AA or oligonucleotide  
67 labels and their derivations. The underlying physical-meaning, especially molecular  
68 structure or conformation is not apparent to the machine agent upon implementing ML  
69 algorithms. There is a loss of generalizability to include the molecules which do not have

70 an obviously intrinsic sequence. Tools that work for or incorporate lipids, carbohydrates,  
 71 and other biomacromolecules in their structures are exceedingly rare. Biological  
 72 processes, however, are seldom isolated for a specific type of molecule, and commonly  
 73 incorporate a wide range of biomolecules. Consequently, there is an imperative need for  
 74 a method capable of encoding diverse biomolecules in a universal and meaningful  
 75 manner (Fig 1) to study the interfacial phenomena at the molecular level. These  
 76 processes may involve all biological systems, e.g., peptide and lipid or peptidoglycan [26],  
 77 and biology/solid soft interfaces relevant to technological and nanomedicine applications  
 78 [27].

| Representation                                   | Letter-Based                                                                                                                        | Structure-Based                                                                                                                                                             |
|--------------------------------------------------|-------------------------------------------------------------------------------------------------------------------------------------|-----------------------------------------------------------------------------------------------------------------------------------------------------------------------------|
| DNA/mRNA                                         | ATC-ATG-GTC-ACC-GAC-AGC-<br>AGC-GAG-TAC-AGC-AGC-TAC                                                                                 | 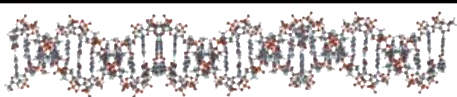                                                                                         |
| Amino Acids                                      | A, C, D, E, F, G, H, I, K, L, M, N, P,<br>Q, R, S, T, V, W, Y                                                                       |                                                                                         |
| Peptides/Proteins                                | I M V T E S S D Y S S Y                                                                                                             |                                                                                         |
| Mathematical representation                      | Alphabetically Arranged AA<br><br>Example: 1-hot |  } A Node                                                                               |
| Deep Learning Architectures Used in Current work |  CNN                                             |  ResNet<br>Nodes Nodes+ Nodes+<br>1st N-N 1 <sup>st</sup> + 2nd N-N<br>Binding Affinity |

CA: central Atom, LP: lone pair, BL: Bond length, BT: Bond Type, BAAt: Bonded Atoms, Ba: Bond Angles, N-N: Nearest-Neighbors

79 **Fig 1. Schematics show the differences between the letter-based and structure-based**  
 80 **representation of biomolecules for ML studies in functionality prediction.** The central  
 81 column is the index while the middle column shows the letter-based representation and the  
 82 rightmost column shows the structure-based representation.

83 Implementations of such ML tools could broaden the paradigm of drug-design,  
84 combating antibiotic resistance, restorative dentistry [28], disease-diagnostics,  
85 biocompatible-coatings, lab-on-chip technologies, and biosensors [29]. In this work, we  
86 demonstrate a comprehensive feature-map for peptides that can be generalizable to other  
87 biomolecules. The immediate goals of the current work have been, (a) To take any AA  
88 sequence and convert it to a VSEPR structure-based representation via a reversible  
89 transformation; (b) To decide on an NN model that takes neighborhood information and  
90 performs consistently well across different length sequences, and (c) To benchmark the  
91 model with respect to the model used in DeepMHC. The long-term goal is to establish  
92 groundwork for future research in developing an accurate, interpretable and generalizable  
93 feature-map that incorporates conformations and multiple biomolecules to study complex  
94 phenomena.

95 The binding-affinity obtained from the current study displays higher prediction  
96 accuracy for 10-AA long peptides than the one-hot encoded shallow CNN model from  
97 DeepMHC [23], while the reverse is true for 9-AA long peptides. 5-fold Cross-Validation  
98 (CV) remains consistent across 9-AA and 10-AA long sequences, a significant  
99 improvement compared to DeepMHC where there is an appreciable drop in predictive  
100 power between 9-AA and 10-AA sequences. Since the VSEPR implementation consists  
101 of a larger feature map in conjunction with a deep residual neural network (ResNet), there  
102 is some overfitting and a loss of interpretability. It is noted that including angles in a GCN  
103 would be more interpretable. Indeed, such a model is aimed as one of the next steps to  
104 be taken towards generation of precise and pan-specific predictive tools, generalizable to  
105 other biomolecules of interest in medical and technological applications.

## 106 **Materials and Methods.**

### 107 **Data Cleaning and Preparation**

108 Data compiled in 2013 from IEDB ([www.iedb.org](http://www.iedb.org)) Analysis Resource [24] are  
109 downloaded and cleaned. The binding affinities are measured in terms of Inhibitor  
110 Concentration  $IC_{50}$  required to reduce binding by half [30]. The values are converted to -  
111  $\ln(IC_{50})$ , as a normalization step. According to extant standards, any sequence with an  
112  $IC_{50}$  less than or equal to 500 is labeled as a binder and the others labeled as non-binder  
113 for binary classification. The dataset is then interfaced with a Python script to extract  
114 peptide sequences with transformed binding-affinity values to any allele of interest from  
115 any species within the dataset. All human alleles with at least 1,000 different  
116 corresponding epitope sequences are used in this study. 20% of the sequences are  
117 frozen out of the dataset for testing the model. Remaining 80% of sequences for each  
118 allele are used as a training set. The peptides in each set are then converted into their  
119 VSEPR encoded fingerprints as described below.

### 120 **VSEPR extended structure feature-map**

121 As a first attempt, Bioluminate [31] is used to obtain the protein data bank (PDB)  
122 files for each of the naturally occurring AA. These PDB files contain information for each  
123 atom, including the data of atom type (in terms of atomic number) and cartesian  
124 coordinates of the given atom in space. The ProDy [32] library in python is used to  
125 traverse through the PDB files. Iterating through each of the neighbors of an atom, the  
126 bond type of each neighbor bonded to the central atom (CA) is obtained, based on prior  
127 knowledge of the AA structures. Euclidean distances are calculated to determine

128 corresponding bond lengths. The number of lone pairs on any given CA is inferred based  
 129 on the number of bonds and the bond-types that the given atom has, and its electronic  
 130 structure. To calculate the angles made by pairs of Bonded-Atoms subtended at the CA,  
 131 angle formula is used, and it is repeated parallelly for all CA and all combinations of  
 132 Bonded-Atoms pairs per CA. Fig 2 shows the schematic of such a feature-map for Serine  
 133 in an example peptide sequence.

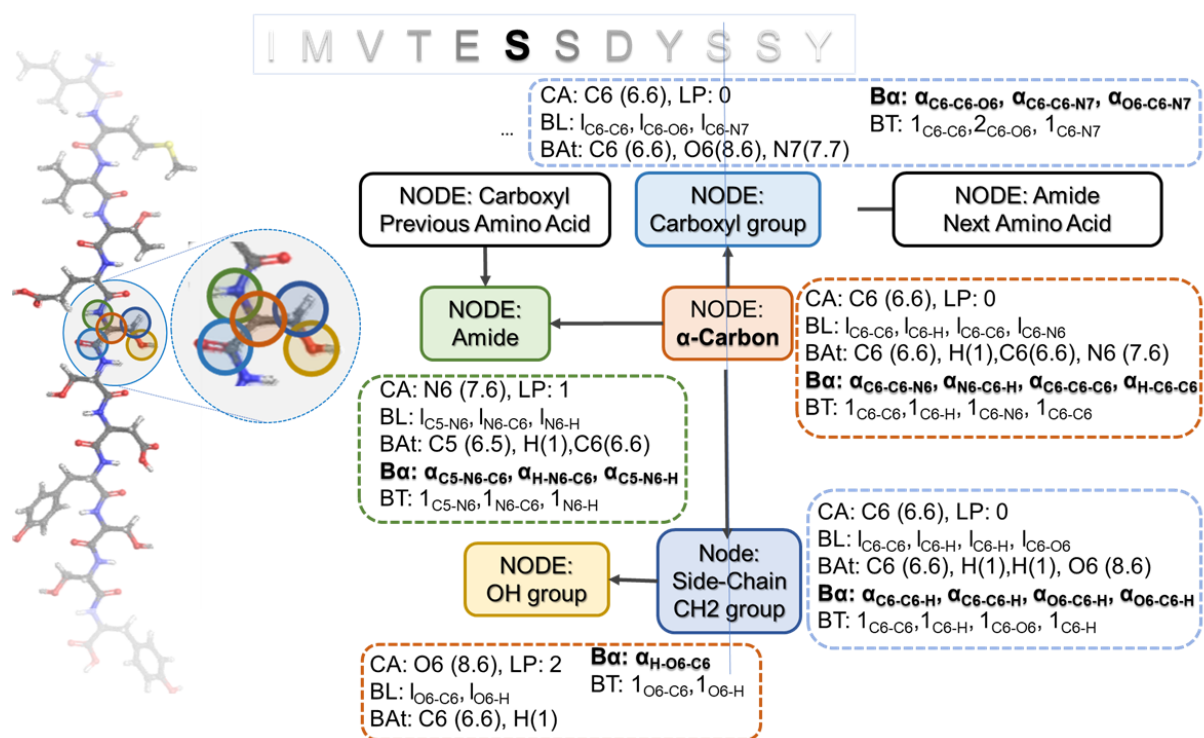

134 **Fig 2. Schematic of Valence Shell Electron Pair Repulsion structural feature-map for**  
 135 **bioinformatics studies.** Green: N-terminus/Connection from previous Amino-Acid, Orange:  
 136 Alpha-Carbon, Dark-Blue: Functional groups in side-chain, and Light-Blue: Connection to next  
 137 Amino-Acid/C-terminus. Each such node contains 5 channels of information: Central Atom (CA)  
 138 with associated Lone Pairs (LP), Bond lengths (BL), Bonded Atoms (BAT), Bond Types (BT) and  
 139 Bond Angles (Ba).



140           The information for a given CA is appended to all successive non-hydrogen CA's  
141 starting from the N-terminus of the peptide and ending at the C-terminus. Each type of  
142 parameter obtained from the VSEPR extended structure, is input as a separate channel  
143 of data to the neural network for training without overlap. The tenths place-value of the  
144 atomic number of the CA is the index of the residue location and the hundredths place-  
145 value is the location within the residue. For example, the  $\alpha$ -Carbon in the 1<sup>st</sup> AA at the N-  
146 terminus is given a value 6.01, whereas the carbon at the center of the planar carboxyl  
147 group bonded to the amine group of the 2<sup>nd</sup> AA, is given a value of 6.00 (See S1 Appendix  
148 for more details).

149           The symbolic-connectivity reduces dimensionality but increases information  
150 bandwidth. It means that there are now two non-linear data bands in terms of power of  
151 10. One band is  $10^{-2}$  and the other is  $10^{-1}$  in this case. Since the bands do not overlap,  
152 owing to the channel-splitting, machine learning methods also work as long as there are  
153 enough hidden layers to fit the respective non linearity levels. This is a way of multiplexing  
154 three separate inputs into one. Future implementations will eliminate this input through  
155 analytical transformation that only affects linear part of dominating input parameters.  
156 Binary vectorization of the encoding will also be attempted since power of two is more  
157 flexible instead of power of 10, in management of information bandwidth. Nevertheless,  
158 incorporating conformations as well as using adjacency matrices in a GCN is the clear  
159 next step towards making VSEPR methodology more impactful.

## 160 **Neural Network Architecture**

161           Since behavior of molecular components of peptides depends on their  
162 neighborhood, Residual Neural Network (ResNet) was chosen to incorporate such

163 information. The schematic of the process is shown in Fig 3. Such a Neural Network  
164 architecture comprises of a convolution block called the Residual Convolutional Unit  
165 (RCU) which performs a set of convolutions on the channels and a Fully Connected (FC)  
166 block. The RCU is implemented in terms of an Efficient Spatial Pyramid (ESP) [33]. ESP  
167 in the RCU allows for an improved gradient flow for training the network and essentially  
168 makes each atom 'see' its neighbors.

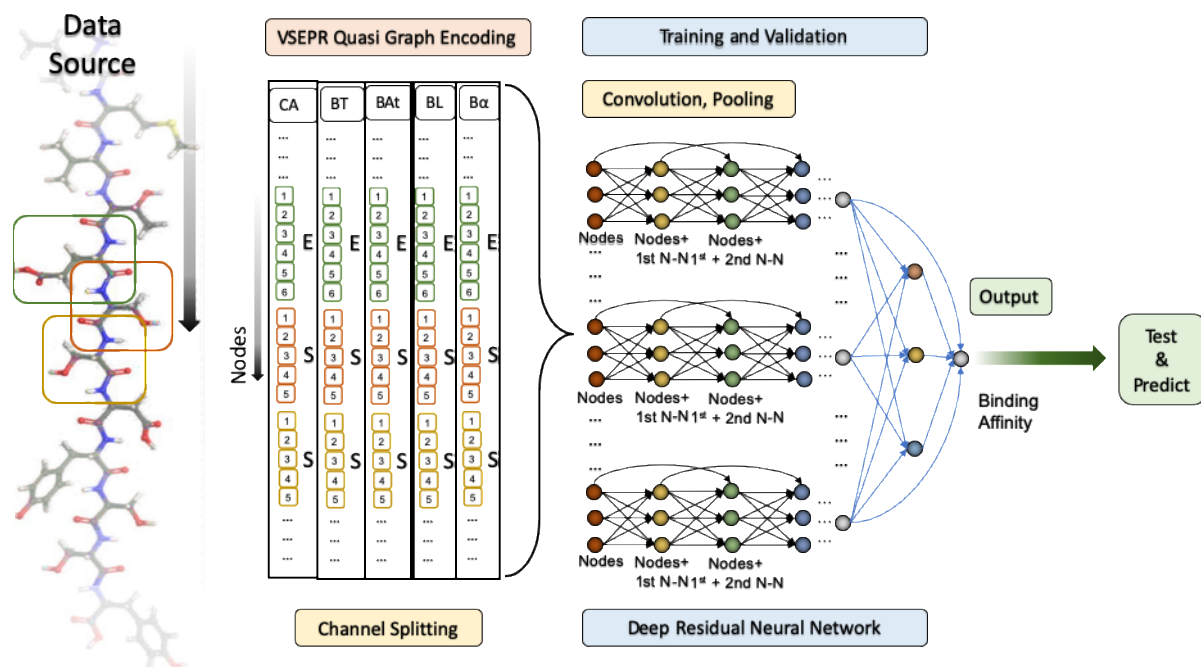

169 **Fig 3. Schematic of the Training and Validation with the ResNet Architecture.** In the  
170 convolution block, convolution proceeds on all atomic nodes simultaneously, with each  
171 successive layer seeing effects from more neighbors. Features thus extracted are sent through a  
172 fully connected network for prediction. The prediction can be carried out on any function that can  
173 be represented in terms of a numerical value. Here we predict the  $-\ln(\text{IC}_{50})$  binding affinity.

174 The outputs of the ESP enhanced RCU block are then passed into the FC block,  
175 with a Rectified-Linear-Unit activation on all the layers and SoftMax on the last. Mean-  
176 Squared-Error is the loss function to be minimized to output the binding affinity of the

177 peptide to the corresponding MHC-I allele. Batch Normalization is performed after every  
178 layer in the network. Randomly initialized weights are then learned in a supervised  
179 learning protocol and hyperparameters are tuned following a training process as  
180 described below.

## 181 **Training, Validation and Testing.**

182 Sequences for each allele in the training-set are divided into five equal parts  
183 randomly selected, to set the stage for a 5-fold cross-validation as a control against  
184 sampling bias. Four out of five such parts are used to train the model and the fifth one is  
185 used for testing. Then the model rotates through another set of four such parts as training  
186 and fifth one as test set. In each such model training round, per allele, each of the feature-  
187 maps are split into 5 channels per input sequence. They are sent in simultaneously in  
188 mini-batches of 20 peptides at a time into the ResNet described above, for 5000 epochs.  
189 The PyTorch [34] deep-learning library is used for training. The model is labeled  
190 'converged', if validation loss (10% of the training data is used for validation) did not  
191 reduce by more than 1% for 100 subsequent epochs.

192 After the training is completed, hyperparameters are tuned to maximize the 5-fold  
193 cross validation resulting in a learning rate of  $5e^{-4}$ . The process is repeated three times  
194 to ensure that the cross-validations observed are consistent and not affected by choice  
195 of training samples. A similar procedure is followed to train a regular Convolutional neural  
196 Network with one-hot encoded peptide sequences as in DeepMHC for one-to-one  
197 comparison and evaluation. Meanwhile, the 20% of data frozen before training is then  
198 used as a blind test set for evaluating model performance.

199

## 200 **Results and Discussions**

201 We compare the allele-specific VSEPRnet model with the state-of-the-art CNN model,  
202 DeepMHC that works with letter-based fingerprints. The 5-fold CV results as obtained by  
203 the reproduced DeepMHC model versus the current VSEPRnet model is shown in Fig 4A  
204 and 4B for 9-AA and 10-AA long sequences respectively. Results show a consistent  
205 response across sequence lengths in the VSEPRnet case in contrast to DeepMHC,  
206 where there is a fall in prediction accuracy for 10-AA sequences (refer S1 Fig). In the  
207 case of DeepMHC, the average 5-fold CV (Fig 4C) across all alleles studied is 0.87 for 9-  
208 AA sequences, with a standard-deviation of 0.03. For 10-AA sequences it is 0.65 with a  
209 standard deviation of 0.11. For VSEPRnet, the average 5-fold CV for 9-AA long peptides  
210 is 0.74 with a standard deviation of 0.06. While for 10-AA long peptides it is 0.69 with a  
211 standard-deviation of 0.03. Taking available data and overfitting into consideration,  
212 VSEPRnet therefore has a consistency in predictability over sequence lengths. One of  
213 the reasons for a marked fall in cross validation for 10-length sequences, as outlined in  
214 DeepMHC, is a dependency of the model on distal effects which dominate as lengths  
215 increase. We note that because feature-maps and neural-network architectures usually  
216 go hand-in-hand, further investigation is mandated to isolate the cause of the flattening  
217 response observed in the case of VSEPRnet. However, due to the nature of the ESP  
218 convolution block in the ResNet architecture, distal effects in the convolution may not  
219 dominate. Moreover, the distinction in input sizes between 9-AA and 10-AA peptides is  
220 based on physical rather than sequence length.

221 Since the VSEPR feature-map contains more information than the one hot  
222 encoding, the data required to avoid over-fitting becomes higher. Thus, the lack of

223 requisite data-density lowers the average 5-fold CV from 0.87 (DeepMHC) to 0.74  
 224 (VSEPRnet) for the 9-AA long peptides. As discussed previously, there is a role-reversal  
 225 for the 10-AA case because there is a pronounced distal-effect in the DeepMHC  
 226 implementation whereas it is negligible for the VSEPRnet implementation (see S2  
 227 Appendix for more details). The overall performance of VSEPRnet in terms of 5-fold CV  
 228 is contingent mostly on the available data-points to train on. Future work could be directed  
 229 to implement the model on datasets with higher density of data obtained from High  
 230 Throughput Sequencing techniques [35].

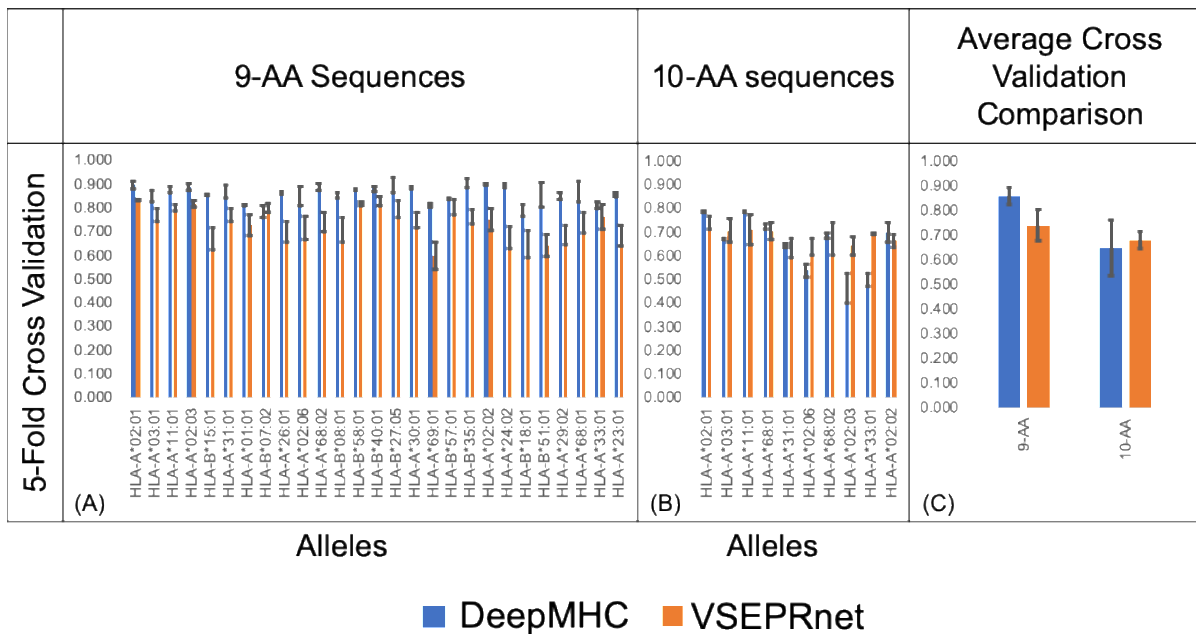

231 **Fig 4. 5-Fold Cross Validation results from VSEPRnet compared with DeepMHC.** (A) 5-fold  
 232 CV for 9-Length peptide sequences and (B) 5-fold CV for 10-Length peptide sequences; (C)  
 233 Average 5-fold CV for 9 and 10-AA peptides across alleles. Performance of VSEPRnet falls in  
 234 comparison to DeepMHC in the 9-Length peptides case for most alleles, the most probable  
 235 reason being overfitting due to increased dimensionality. The performance of VSEPRnet is better  
 236 than DeepMHC in case of 10-Length peptides on most alleles due to reduced dominance of distal

237 effects. Overall, VSEPRnet performs consistently across sequence lengths and does not have  
238 the drop in accuracy between 9 and 10-AA peptides as is the case with DeepMHC.

239       Performance Comparison of VSEPRnet and DeepMHC on previously frozen test  
240 data, uses Pearson Coefficient (PC), Spearman Rank Correlation Coefficient (SRCC) and  
241 Area Under receiver operating Curve (AUC) as metrics to compare the performance of  
242 the two models. For the PC metric, VSEPRnet wins on 11 out of 27 alleles in the 9-AA  
243 case and 5 out of 10 alleles in the 10-AA case; for the SRCC metric, VSEPRnet wins on  
244 8 out of 27 alleles in the 9-AA case and 4 out of 10 alleles in the 10-AA case; And for the  
245 AUC metric, VSEPRnet wins or performs equally on 7 out of 27 alleles in the 9-AA case  
246 and wins on 9 out of 10 alleles in the 10-AA case. Across all metrics, the performance of  
247 VSEPRnet is within the first standard deviation of DeepMHC for 9-AA peptides, and for  
248 10-AA peptides, VSEPRnet wins on both PC and AUC metrics. The average PC across  
249 all alleles for DeepMHC is 0.244 with a standard deviation of 0.112 for 9-AA peptides,  
250 and 0.279 with a standard deviation of 0.112 for 10-AA peptides. The average PC for  
251 VSEPRnet is 0.235 with a standard deviation of 0.096 for 9-AA peptides and 0.296 with  
252 a standard deviation of 0.042 for 10-AA peptides. Similarly, across all tested alleles, the  
253 average SRCC of DeepMHC is 0.6 with a standard deviation of 0.140 for 9-AA peptides  
254 and 0.514 with a standard deviation of 0.165 for 10-AA peptides, while the average  
255 SRCC, across all tested alleles for VSEPRnet is 0.571 with a standard deviation of 0.099  
256 for 9-AA peptides and 0.5 with a standard deviation of 0.046 for 10-AA peptides (See Fig  
257 5 and S2 Fig for more details).

258       Additionally, across all tested alleles, the average AUC of DeepMHC is 0.795 with  
259 a standard deviation of 0.072 for 9-AA peptides and 0.684 with a standard deviation of  
260 0.072 for 10-AA peptides, while the average AUC, across all tested alleles for VSEPRnet

261 is 0.767 with a standard deviation of 0.062 for 9-AA peptides and 0.745 with a standard  
262 deviation of 0.025 for 10-AA peptides. A consistent response across alleles is also shown  
263 by the VSEPRnet, without being affected by the sequence length of the peptides.

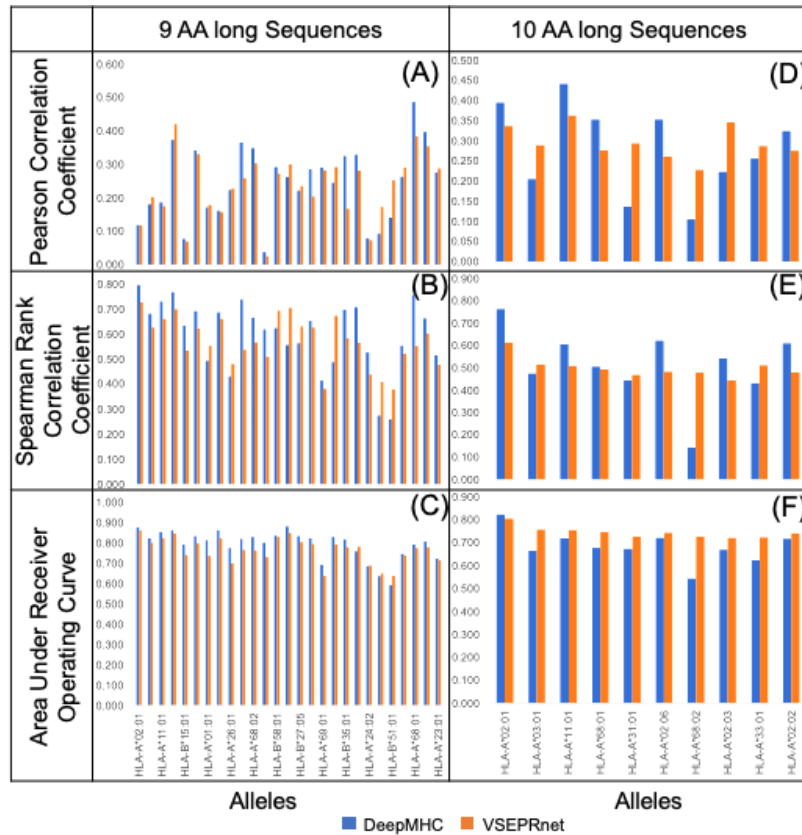

264 **Fig 5. Comparison of DeepMHC and VSEPRnet on test data for 9-AA and 10-AA long**  
265 **peptides.** DeepMHC performs consistently better on the (A) PC, (B) SRCC and (C) AUC metric  
266 for 9-AA long peptides because of lower probability of overfitting due to low information content  
267 of the 1-hot encoding. VSEPRnet PC values are within the mean and spread of the PC values for  
268 DeepMHC. For 10-AA, VSEPRnet performs equally as well as DeepMHC in case of (D) PC and  
269 (E) SRCC, while performing consistently better for (F) AUC owing to the elimination of distal  
270 effects.

271

272

## 273 **Conclusions and Future Work**

274 VSEPRnet is an introductory implementation for extending cheminformatics style  
275 feature-maps to bioinformatics studies while maintaining generalizability across lengths  
276 and molecule-types. There is a demonstrated consistency in prediction-accuracy of  
277 VSEPRnet model across alleles and between 9-AA to 10-AA long peptides binding to  
278 MHC-I allele. Therefore, there are advantages of using this implementation as a first step  
279 in generalization of feature-maps to include other molecules. There is a need to  
280 incorporate conformations and substrate information into the model to make it truly  
281 generalizable to DNA, RNA, proteins, peptides, intrinsically-disordered regions, lipids,  
282 peptidoglycans, phospholipids, sugars, and smaller biomolecules such as vitamins and  
283 co-factors.

284 Since the VSEPRnet 5-fold CV does not show appreciable dependency on distal-  
285 effects, there are available strategies to further improve the displayed generalizability of  
286 the model. The strategies are: (a) Binary-vectorizing the input without overlap between  
287 the channels; (b) Incorporating angular information into GCN; (c) Implementation on high  
288 density datasets; (d) Appending error modulating layers downstream; and (e)  
289 Incorporating allele information to generalize the VSEPRnet to a pan-specific model. It is  
290 also worthy of noting that because the structures of the functional groups are encoded in  
291 VSEPRnet, this is applicable to lipids, peptidoglycans, polynucleotides, small molecules,  
292 sugars, etc. As long as the size of the molecule is within the limits of the training set,  
293 peptide data may be used to train the model while using a small set of peptidoglycans as  
294 the test set, for example.



295 The data and scripts for all the above steps including model building and training are  
296 available on GitHub (<https://github.com/Sarikaya-Lab-GEMSEC>).

## 297 **Acknowledgments**

298 We acknowledge the guidance of Kevin Jamieson (Paul G Allen School of Computer  
299 Science and Engineering), Marina Meila (Statistics), René Overney (Chemical  
300 Engineering and Molecular Engineering and Science Institute) and Deniz T. Yucesoy, (at  
301 GEMSEC), all at the University of Washington.

## 302 **References**

- 303 1. Rogers D, Hahn M. Extended-Connectivity Fingerprints. Journal of Chemical  
304 Information and Modeling. 2010;50(5):742-54.
- 305 2. Takahashi Y, Sukekawa M, Sasaki S. Automatic identification of molecular  
306 similarity using reduced-graph representation of chemical structure. Journal of  
307 Chemical Information and Modeling. 1992;32(6):639-43.
- 308 3. Weininger D, Weininger A, Weininger JL. SMILES. 2. Algorithm for generation  
309 of unique SMILES notation. Journal of Chemical Information and Modeling.  
310 1989;29(2):97-101.
- 311 4. Proceedings of the 1997 1st Electronic Packaging Technology Conference  
312 (Cat. No.97TH8307). Proceedings of the 1997 1st Electronic Packaging  
313 Technology Conference (Cat No 97TH8307) EPTC-97: IEEE; 1997.
- 314 5. Heller S, McNaught A, Stein S, Tchekhovskoi D, Pletnev I. InChI - the  
315 worldwide chemical structure identifier standard. Journal of Cheminformatics.  
316 2013;5(7); 1-9.

- 317 6. Blaschke T, Olivecrona M, Engkvist O, Bajorath J, Chen H. Application of  
318 Generative Autoencoder in De Novo Molecular Design. *Molecular Informatics*.  
319 2017;37(1-2):1700123.
- 320 7. Neese F. An improvement of the resolution of the identity approximation for the  
321 formation of the Coulomb matrix. *Journal of Computational Chemistry*.  
322 2003;24(14):1740-7.
- 323 8. Behler J. Atom-centered symmetry functions for constructing high-dimensional  
324 neural network potentials. *The Journal of Chemical Physics*.  
325 2011;134(7):074106.
- 326 9. Gómez-Bombarelli R, Aguilera-Iparraguirre J, Hirzel TD, Duvenaud D,  
327 Maclaurin D, Blood-Forsythe MA, et al. Design of efficient molecular organic  
328 light-emitting diodes by a high-throughput virtual screening and experimental  
329 approach. *Nature Materials*. 2016;15(10):1120-7.
- 330 10. Kearnes S, McCloskey K, Berndl M, Pande V, Riley P. Molecular graph  
331 convolutions: moving beyond fingerprints. *Journal of Computer-Aided*  
332 *Molecular Design*. 2016;30(8):595-608.
- 333 11. Shariat B, Neumann D, Ben-Hur A. BLRM: A Basic Linear Ranking Model for  
334 Protein Interface Prediction. *IEEE International Conference on Bioinformatics*  
335 *and Biomedicine (BIBM)* 2018 Dec 3 (pp. 29-35).
- 336 12. Feinberg EN, Sur D, Wu Z, Husic BE, Mai H, Li Y, et al. PotentialNet for  
337 Molecular Property Prediction. *ACS Central Science*. 2018;4(11):1520-30.

- 338 13. An Y, Sherman W, Dixon SL. Kernel-Based Partial Least Squares: Application  
339 to Fingerprint-Based QSAR with Model Visualization. *Journal of Chemical*  
340 *Information and Modeling*. 2013;53(9):2312-21.
- 341 14. Dayhoff MO, Schwartz RM, Orcutt BC. 22 a model of evolutionary change in  
342 proteins. In *Atlas of protein sequence and structure 1978* (Vol. 5, pp. 345-352).  
343 National Biomedical Research Foundation Silver Spring.
- 344 15. Henikoff S, Henikoff JG. Amino acid substitution matrices from protein blocks.  
345 *Proceedings of the National Academy of Sciences*. 1992;89(22):10915-9.
- 346 16. Needleman SB, Wunsch CD. A general method applicable to the search for  
347 similarities in the amino acid sequence of two proteins. *Journal of Molecular*  
348 *Biology*. 1970;48(3):443-53.
- 349 17. Smith TF, Waterman MS. Identification of common molecular subsequences.  
350 *Journal of Molecular Biology*. 1981;147(1):195-7.
- 351 18. Murzin AG, Brenner SE, Hubbard T, Chothia C. SCOP: A structural  
352 classification of proteins database for the investigation of sequences and  
353 structures. *Journal of Molecular Biology*. 1995;247(4):536-40.
- 354 19. Dawson NL, Lewis TE, Das S, Lees JG, Lee D, Ashford P, et al. CATH: an  
355 expanded resource to predict protein function through structure and sequence.  
356 *Nucleic Acids Research*. 2016;45(D1):D289-D95.
- 357 20. Holm L, Ouzounis C, Sander C, Tuparev G, Vriend G. A database of protein  
358 structure families with common folding motifs. *Protein Science*.  
359 1992;1(12):1691-8.

- 360 21. Vang YS, Xie X. HLA class I binding prediction via convolutional neural  
361 networks. *Bioinformatics*. 2017;33(17):2658-65.
- 362 22. Brusica V, Rudy G, Honeyman G, Hammer J, Harrison L. Prediction of MHC  
363 class II-binding peptides using an evolutionary algorithm and artificial neural  
364 network. *Bioinformatics*. 1998;14(2):121-30.
- 365 23. Hu J, Liu Z. DeepMHC: Deep convolutional neural networks for high-  
366 performance peptide-MHC binding affinity prediction. *bioRxiv*. 2017 Jan  
367 1:239236.
- 368 24. Zhang Q, Wang P, Kim Y, Haste-Andersen P, Beaver J, Bourne PE, et al.  
369 Immune epitope database analysis resource (IEDB-AR). *Nucleic Acids  
370 Research*. 2008;36(Web Server):W513-W8.
- 371 25. Liu Z, Cui Y, Xiong Z, Nasiri A, Zhang A, Hu J. DeepSeqPan, a novel deep  
372 convolutional neural network model for pan-specific class I HLA-peptide  
373 binding affinity prediction. *Scientific Reports*. 2019 Jan 28;9(1):794.
- 374 26. Thiam K, Loing E, Verwaerde C, Auriault C, Gras-Masse H. IFN- $\gamma$ -derived  
375 lipopeptides: influence of lipid modification on the conformation and the ability  
376 to induce MHC class II expression on murine and human cells. *Journal of  
377 medicinal chemistry*. 1999 Sep 9;42(18):3732-6.
- 378 27. Yamankurt G, Berns EJ, Xue A, Lee A, Bagheri N, Mrksich M, Mirkin CA.  
379 Exploration of the nanomedicine-design space with high-throughput screening  
380 and machine learning. *Nature Biomedical Engineering*. 2019, 3(1), 318–327.
- 381 28. Dogan S, Fong H, Yucesoy DT, Cousin T, Gresswell C, Dag S, Huang G,  
382 Sarikaya M. Biomimetic tooth repair: amelogenin-derived peptide enables in

- 383 vitro remineralization of human enamel. *ACS Biomaterials Science &*  
384 *Engineering*. 2018 Mar 9;4(5):1788-96.
- 385 29. Hayamizu Y, So CR, Dag S, Page TS, Starkebaum D, Sarikaya M.  
386 Bioelectronic interfaces by spontaneously organized peptides on 2D atomic  
387 single layer materials. *Scientific Reports*. 2016 Sep 22;6:33778.
- 388 30. Yung-Chi C, Prusoff WH. Relationship between the inhibition constant (KI) and  
389 the concentration of inhibitor which causes 50 per cent inhibition (I50) of an  
390 enzymatic reaction. *Biochemical pharmacology*. 1973 Dec 1;22(23):3099-108.
- 391 31. Bhachoo J, Beuming T. Investigating Protein–Peptide Interactions Using the  
392 Schrödinger Computational Suite. In *Modeling Peptide-Protein Interactions*  
393 2017 (pp. 235-254). Humana Press, New York, NY.
- 394 32. Bakan A, Meireles LM, Bahar I. ProDy: Protein Dynamics Inferred from Theory  
395 and Experiments. *Bioinformatics*. 2011;27(11):1575-7.
- 396 33. Mehta S, Rastegari M, Caspi A, Shapiro L, Hajishirzi H. ESPNet: Efficient  
397 Spatial Pyramid of Dilated Convolutions for Semantic Segmentation. *Computer*  
398 *Vision – ECCV 2018: Springer International Publishing; 2018*. p. 561-80.
- 399 34. Mishra P. Introduction to Neural Networks Using PyTorch. In *PyTorch Recipes*  
400 2019 (pp. 111-126). Apress, Berkeley, CA.
- 401 35. Metzker ML. Sequencing technologies—the next generation. *Nature reviews*  
402 *genetics*. 2010 Jan;11(1):31.

403

404

405

## 406 **Supporting information**

407 **S1 Appendix. Description of Channel Inputs to VSEPRnet.** This section describes the  
408 information obtained from VSEPR structures of peptides that is sent through each of the  
409 5 channels into the neural network.

410 **S1 Fig. 5-fold CV data across all alleles.** The 5-fold CV of training set peptides for 9  
411 and 10-Amino Acid long sequences, and their means and standard deviations are  
412 tabulated for DeepMHC and VSEPRnet.

413 **S2 Appendix. Model Comparison of dependency of 5-fold CV on available training**  
414 **data.** This section describes the dependency of 5-fold CV's obtained from the VSEPRnet  
415 and DeepMHC models on available training data.

416 **S2 Fig. PC, SRCC and AUC metrics from test set.** The Pearson Correlations,  
417 Spearman Rank Correlation Coefficients, and Area Under the Curve of test peptides for  
418 9 and 10-Amino Acid long sequences, for DeepMHC and VSEPRnet implementations  
419 and their means and standard deviations are tabulated.
